# Supplementary material for: Identification and Functional Characterization of General Odorant Binding Proteins in Orthaga achatina
Source: MDPI journal article supplement (doi:10.3390/insects14030216), 2023-02-22
Supplement: s1 [file s1]

**Table S2.** Accession numbers for GOBPs used in the phylogenetic analysis.

| <b>Species</b>                | <b>Gene Name</b> | <b>Acc. number</b> |
|-------------------------------|------------------|--------------------|
| <i>Amyelois transitella</i>   | AtraGOBP1        | ACX47893.1         |
|                               | AtraGOBP2        | ACX47894.1         |
| <i>Antheraea pernyi</i>       | AperGOBP1        | CAA71866.1         |
|                               | AperGOBP2        | CAA65575.1         |
| <i>Bombyx mori</i>            | BmorGOBP1        | NP_001037496.1     |
|                               | BmorGOBP2        | NP_001037498.1     |
| <i>Chilo suppressalis</i>     | CsupGOBP1        | ACJ07129.1         |
|                               | CsupGOBP2        | ACJ07120.1         |
| <i>Ectropis obliqua</i>       | EoblGOBP1        | ACN29680.1         |
|                               | EoblGOBP2        | ACN29681.1         |
| <i>Epiphyas postvittana</i>   | EposGOBP1        | Q95VP3.1           |
|                               | EposGOBP2        | AAL05869.1         |
| <i>Grapholita molesta</i>     | GmolGOBP1        | AFH02841.1         |
|                               | GmolGOBP2        | AFH02842.1         |
| <i>Helicoverpa armigera</i>   | HarmGOBP1        | XP_021192665.1     |
|                               | HarmGOBP2        | CAC08211.1         |
| <i>Helicoverpa assulta</i>    | HassGOBP1        | AAW65076.1         |
|                               | HassGOBP2        | AAQ54909.1         |
| <i>Mythimna separata</i>      | MsepGOBP1        | AWT22240.1         |
|                               | MsepGOBP2        | AWT22242.1         |
| <i>Operophtera brumata</i>    | ObruGOBP1        | KOB67878.1         |
|                               | ObruGOBP2        | KOB70852.1         |
| <i>Ostrinia nubilalis</i>     | OnubGOBP1        | BBB15959.1         |
|                               | OnubGOBP2        | BBB15969.1         |
| <i>Spodoptera exigua</i>      | SexiGOBP1        | ACY78412.1         |
|                               | SexiGOBP2        | CAC12832.1         |
| <i>Spodoptera litura</i>      | SlitGOBP1        | ABM54823.1         |
|                               | SlitGOBP2        | ABM54824.1         |
| <i>Streltziella insularis</i> | SinsGOBP1        | QLI62030.1         |
|                               | SinsGOBP2        | QLI62031.1         |
