# Supplementary material for: Identification and Functional Characterization of General Odorant Binding Proteins in Orthaga achatina
Source: MDPI journal article supplement (doi:10.3390/insects14030216), 2023-02-22
Supplement: s1 [file s1]

**Table S5.** The distance between the partial carbon atoms on the amino acid residues of OachGOBP1 and each farnesol atom.

| OachGOBP1<br>Farnesol atom | THR32-CA | THR32-CB | THR32-CG2 | TRP60-CD1 | TRP60-CE2 | TRP60-CZ2 | Structure                                                                           |
|----------------------------|----------|----------|-----------|-----------|-----------|-----------|-------------------------------------------------------------------------------------|
| <b>C1</b>                  | 5.1 Å    | 4.7 Å    | 4.8 Å     | 5.0 Å     | 4.1 Å     | 3.8 Å     | 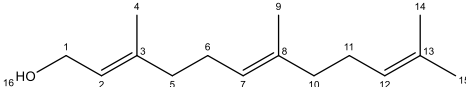 |
| <b>C2</b>                  | 6.0 Å    | 5.4 Å    | 5.7 Å     | 6.1 Å     | 5.3 Å     | 5.0 Å     |                                                                                     |
| <b>C3</b>                  | 6.4 Å    | 6.4 Å    | 6.4 Å     | 7.3 Å     | 6.6 Å     | 6.2 Å     |                                                                                     |
| <b>C4</b>                  | 5.8 Å    | 6.2 Å    | 6.4 Å     | 7.9 Å     | 7.1 Å     | 6.7 Å     |                                                                                     |
| <b>C5</b>                  | 7.6 Å    | 7.8 Å    | 7.6 Å     | 8.5 Å     | 7.8 Å     | 7.5 Å     |                                                                                     |
| <b>C6</b>                  | 8.8 Å    | 8.7 Å    | 8.5 Å     | 8.7 Å     | 7.9 Å     | 7.5 Å     |                                                                                     |
| <b>C7</b>                  | 10.0 Å   | 10.0 Å   | 9.8 Å     | 10.1 Å    | 9.2 Å     | 8.6 Å     |                                                                                     |
| <b>C8</b>                  | 10.4 Å   | 10.5 Å   | 10.5 Å    | 10.6 Å    | 9.4 Å     | 8.6 Å     |                                                                                     |
| <b>C9</b>                  | 9.8 Å    | 9.8 Å    | 10.0 Å    | 9.9 Å     | 8.4 Å     | 7.5 Å     |                                                                                     |
| <b>C10</b>                 | 11.7 Å   | 11.9 Å   | 11.9 Å    | 12.1 Å    | 10.9 Å    | 10.0 Å    |                                                                                     |
| <b>C11</b>                 | 11.8 Å   | 12.2 Å   | 12.3 Å    | 12.9 Å    | 11.8 Å    | 11.0 Å    |                                                                                     |
| <b>C12</b>                 | 11.5 Å   | 12.0 Å   | 12.3 Å    | 13.1 Å    | 11.8 Å    | 10.9 Å    |                                                                                     |
| <b>C13</b>                 | 10.5 Å   | 11.0 Å   | 11.4 Å    | 12.5 Å    | 11.3 Å    | 10.5 Å    |                                                                                     |
| <b>C14</b>                 | 9.3 Å    | 9.9 Å    | 10.2 Å    | 11.5 Å    | 10.5 Å    | 9.8 Å     |                                                                                     |
| <b>C15</b>                 | 10.5 Å   | 11.2 Å   | 11.7 Å    | 13.0 Å    | 11.7 Å    | 10.8 Å    |                                                                                     |
| <b>O16</b>                 | 4.4 Å    | 3.7 Å    | 3.5 Å     | 4.0 Å     | 3.7 Å     | 3.8 Å     |                                                                                     |

Note: “partial carbon atoms” refers to the carbon atom on an amino acid hydrogen-bonded to the ligand and within the range of ligand 4 Å.

The atoms on all ligands (except hydrogen atoms) are numbered for statistical purposes. The atom numbers are shown in the structure column.

**Table S6.** The distance between the partial carbon atoms on the amino acid residues of OachGOBP1 and each Z11-16: OH atom.

| OachGOBP1<br>Z11-16: OH atom | TRP60-CD1 | TRP60-CE2 | TRP60-CZ2 | TRP60-CH2 | Structure                                                                           |
|------------------------------|-----------|-----------|-----------|-----------|-------------------------------------------------------------------------------------|
| C1                           | 8.3 Å     | 7.6 Å     | 7.1 Å     | 8.1 Å     | 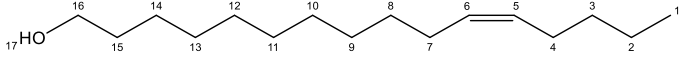 |
| C2                           | 9.1 Å     | 8.2 Å     | 7.5 Å     | 8.3 Å     |                                                                                     |
| C3                           | 10.5 Å    | 9.6 Å     | 9 Å       | 9.7 Å     |                                                                                     |
| C4                           | 11.0 Å    | 10.1 Å    | 9.5 Å     | 10.1 Å    |                                                                                     |
| C5                           | 12.3 Å    | 11.2 Å    | 10.4 Å    | 10.9 Å    |                                                                                     |
| C6                           | 13.0 Å    | 11.8 Å    | 11.0 Å    | 11.3 Å    |                                                                                     |
| C7                           | 12.7 Å    | 11.7 Å    | 10.9 Å    | 11.2 Å    |                                                                                     |
| C8                           | 12.9 Å    | 11.7 Å    | 10.9 Å    | 10.9 Å    |                                                                                     |
| C9                           | 11.7 Å    | 10.4 Å    | 9.6 Å     | 9.6 Å     |                                                                                     |
| C10                          | 10.9 Å    | 9.4 Å     | 8.5 Å     | 8.5 Å     |                                                                                     |
| C11                          | 9.6 Å     | 8.2 Å     | 7.4 Å     | 7.5 Å     |                                                                                     |
| C12                          | 8.5 Å     | 7.3 Å     | 6.6 Å     | 6.8 Å     |                                                                                     |
| C13                          | 8.4 Å     | 7.5 Å     | 7.1 Å     | 7.5 Å     |                                                                                     |
| C14                          | 7.2 Å     | 6.5 Å     | 6.2 Å     | 6.9 Å     |                                                                                     |
| C15                          | 6.1 Å     | 5.2 Å     | 4.8 Å     | 5.5 Å     |                                                                                     |
| C16                          | 4.8 Å     | 4.3 Å     | 4.2 Å     | 5.2 Å     |                                                                                     |
| O17                          | 4.5 Å     | 3.5 Å     | 3.2 Å     | 4.4 Å     |                                                                                     |

**Table S7.** The distance between the partial carbon atoms on the amino acid residues of OachGOBP2 and each Z3-Hexen-1-ol atom.

| OachGOBP2<br>Z3-Hexen-1-ol atom | THR88-C | ARG132-CZ | Structure                                                                           |
|---------------------------------|---------|-----------|-------------------------------------------------------------------------------------|
| C1                              | 10.3 Å  | 10.3 Å    | 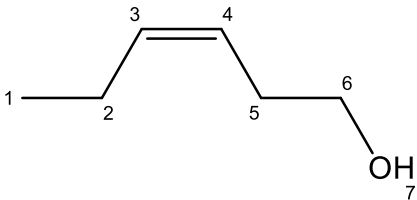 |
| C2                              | 8.8 Å   | 9.2 Å     |                                                                                     |
| C3                              | 8.3 Å   | 8.3 Å     |                                                                                     |
| C4                              | 7.1 Å   | 7.0 Å     |                                                                                     |
| C5                              | 6.0 Å   | 6.3 Å     |                                                                                     |
| C6                              | 5.3 Å   | 4.8 Å     |                                                                                     |
| O7                              | 3.9 Å   | 4.2 Å     |                                                                                     |

**Table S8.** The distance between the partial carbon atoms on the amino acid residues of OachGOBP2 and each Linalool atom.

| OachGOBP2<br>Linalool atom | THR31-CA | THR31-CB | THR31-CG2 | TRP59-CE2 | TRP59-CZ2 | Structure                                                                            |
|----------------------------|----------|----------|-----------|-----------|-----------|--------------------------------------------------------------------------------------|
| C1                         | 4.8 Å    | 4.7 Å    | 4.8 Å     | 4.6 Å     | 4.3 Å     | 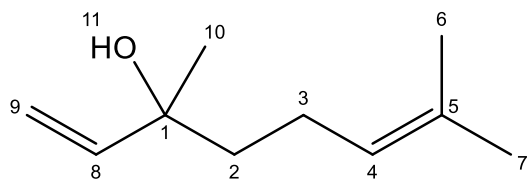 |
| C2                         | 4.5 Å    | 4.8 Å    | 4.9 Å     | 6.0 Å     | 5.8 Å     |                                                                                      |
| C3                         | 4.9 Å    | 5.6 Å    | 6.0 Å     | 6.9 Å     | 6.4 Å     |                                                                                      |
| C4                         | 6.2 Å    | 6.9 Å    | 7.2 Å     | 8.2 Å     | 7.7 Å     |                                                                                      |
| C5                         | 7.4 Å    | 8.1 Å    | 8.3 Å     | 8.6 Å     | 8.0 Å     |                                                                                      |
| C6                         | 7.8 Å    | 8.2 Å    | 8.5 Å     | 8.0 Å     | 7.2 Å     |                                                                                      |
| C7                         | 8.7 Å    | 9.4 Å    | 9.5 Å     | 10.0 Å    | 9.4 Å     |                                                                                      |
| C8                         | 6.2 Å    | 6.0 Å    | 5.8 Å     | 4.9 Å     | 4.6 Å     |                                                                                      |
| C9                         | 7.0 Å    | 6.9 Å    | 6.5 Å     | 6.1 Å     | 5.9 Å     |                                                                                      |
| C10                        | 5.1 Å    | 4.9 Å    | 5.4 Å     | 4.3 Å     | 3.7 Å     |                                                                                      |
| O11                        | 4.1 Å    | 3.7 Å    | 3.5 Å     | 3.7 Å     | 3.9 Å     |                                                                                      |

**Table S9.** The distance between the partial carbon atoms on the amino acid residues of OachGOBP2 and each  $\beta$ -Ionone atom.

| <b>OachGOBP2<br/><math>\beta</math>-Ionone atom</b> | <b>SER78-C</b> | <b>Structure</b>                                                                    |
|-----------------------------------------------------|----------------|-------------------------------------------------------------------------------------|
| <b>O1</b>                                           | 4.1 Å          | 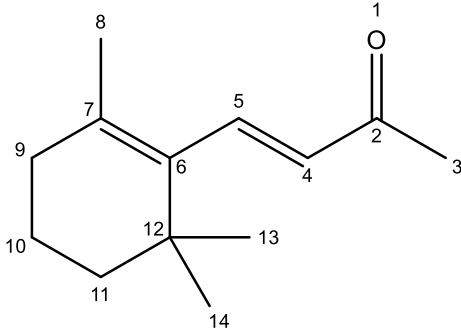 |
| <b>C2</b>                                           | 5.0 Å          |                                                                                     |
| <b>C3</b>                                           | 5.9 Å          |                                                                                     |
| <b>C4</b>                                           | 5.7 Å          |                                                                                     |
| <b>C5</b>                                           | 5.5 Å          |                                                                                     |
| <b>C6</b>                                           | 6.5 Å          |                                                                                     |
| <b>C7</b>                                           | 6.8 Å          |                                                                                     |
| <b>C8</b>                                           | 6.3 Å          |                                                                                     |
| <b>C9</b>                                           | 8.1 Å          |                                                                                     |
| <b>C10</b>                                          | 8.9 Å          |                                                                                     |
| <b>C11</b>                                          | 9.0 Å          |                                                                                     |
| <b>C12</b>                                          | 7.7 Å          |                                                                                     |
| <b>C13</b>                                          | 7.4 Å          |                                                                                     |
| <b>C14</b>                                          | 8.3 Å          |                                                                                     |

**Table S10.** The distance between the partial carbon atoms on the amino acid residues of OachGOBP2 and each Z11-16: OAc atom.

| OachGOBP2        |          | Structure                                                                          |
|------------------|----------|------------------------------------------------------------------------------------|
| Z11-16: OAc atom | SER78-CB |                                                                                    |
| C1               | 7.4 Å    | 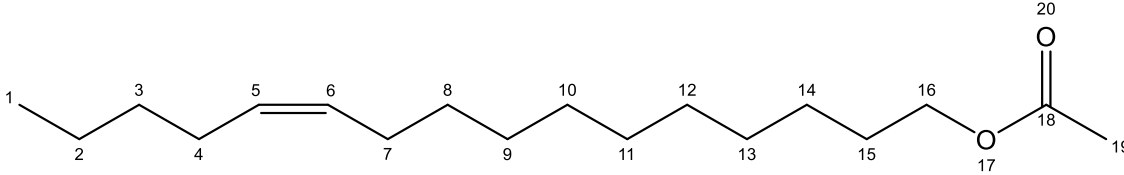 |
| C2               | 7.7 Å    |                                                                                    |
| C3               | 8.4 Å    |                                                                                    |
| C4               | 8.2 Å    |                                                                                    |
| C5               | 7.8 Å    |                                                                                    |
| C6               | 8.2 Å    |                                                                                    |
| C7               | 9.1 Å    |                                                                                    |
| C8               | 9.5 Å    |                                                                                    |
| C9               | 10.6 Å   |                                                                                    |
| C10              | 10.3 Å   |                                                                                    |
| C11              | 9.9 Å    |                                                                                    |
| C12              | 8.5 Å    |                                                                                    |
| C13              | 7.8 Å    |                                                                                    |
| C14              | 6.3 Å    |                                                                                    |
| C15              | 6.2 Å    |                                                                                    |
| C16              | 5.8 Å    |                                                                                    |
| O17              | 4.5 Å    |                                                                                    |
| C18              | 4.6 Å    |                                                                                    |
| C19              | 5.8 Å    |                                                                                    |
| O20              | 4.1 Å    |                                                                                    |

**Table S11.** The distance between the partial carbon atoms on the amino acid residues of OachGOBP2 and each Z3-Hexenyl acetate atom.

| Z3-Hexenyl acetate atom | OachGOBP2 | THR31-CA | THR31-CB | THR31-CG2 | Structure                                                                           |
|-------------------------|-----------|----------|----------|-----------|-------------------------------------------------------------------------------------|
|                         |           |          |          |           |                                                                                     |
| C1                      |           | 4.4 Å    | 5.1 Å    | 5.5 Å     | 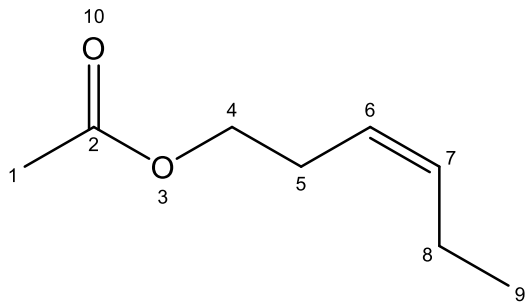 |
| C2                      |           | 3.7 Å    | 4.0 Å    | 4.5 Å     |                                                                                     |
| O3                      |           | 4.1 Å    | 4.1 Å    | 4.1 Å     |                                                                                     |
| C4                      |           | 5.3 Å    | 4.9 Å    | 4.9 Å     |                                                                                     |
| C5                      |           | 6.5 Å    | 6.3 Å    | 6.2 Å     |                                                                                     |
| C6                      |           | 6.8 Å    | 6.6 Å    | 6.2 Å     |                                                                                     |
| C7                      |           | 7.6 Å    | 7.7 Å    | 7.2 Å     |                                                                                     |
| C8                      |           | 8.4 Å    | 8.6 Å    | 8.3 Å     |                                                                                     |
| C9                      |           | 8.0 Å    | 8.5 Å    | 8.4 Å     |                                                                                     |
| O10                     |           | 3.5 Å    | 3.7 Å    | 4.6 Å     |                                                                                     |
