# Supplementary material for: Identification and Functional Characterization of General Odorant Binding Proteins in Orthaga achatina
Source: MDPI journal article supplement (doi:10.3390/insects14030216), 2023-02-22
Supplement: s1 [file s1]

# OachGOBP2

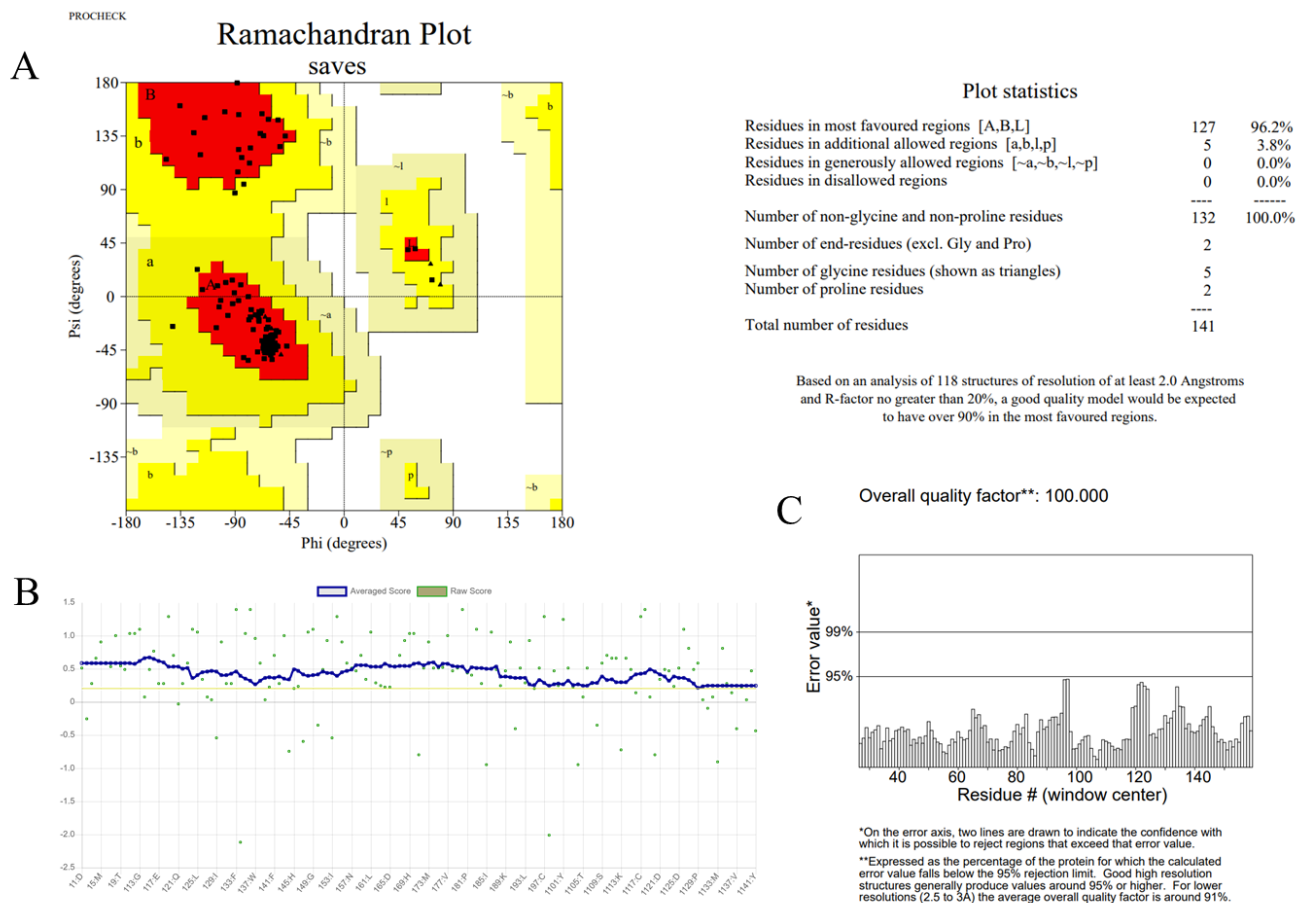

**Figure S2.** Evaluation of OachGOBP2. A. Ramachandran plot. B. Verify 3D graph. C. ERRAT generated result.
