# Supplementary material for: Identification and Functional Characterization of General Odorant Binding Proteins in Orthaga achatina
Source: MDPI journal article supplement (doi:10.3390/insects14030216), 2023-02-22
Supplement: s1 [file s1]

**Table S3.** Sex pheromones and plant volatiles used in this study.

| Ligands                                             |                            | Purity | CAS NO.     |
|-----------------------------------------------------|----------------------------|--------|-------------|
| <b>Sex pheromone</b>                                |                            |        |             |
| (Z11)-Hexadecenol                                   | Z11-16: OH                 | >95%   | 56683-54-6  |
| (Z11)-Hexadecenyl acetate                           | Z11-16: OAc                | >95%   | 34010-21-4  |
| (Z11)-Hexadecenol                                   | Z11-16: Ald                | >95%   | 53939-28-9  |
| (3Z,6Z,9Z,12Z,15Z)-<br>3,6,9,12,15- Tricosapentaene | Z3,Z6,Z9,Z12,Z15-<br>23: H | >95%   | 854201-94-8 |
| <b>Plant volatiles</b>                              |                            |        |             |
| 1-Hexanol                                           |                            | 98%    | 111-27-3    |
| (Z3)-Hexenyl acetate                                |                            | 98%    | 3681-71-8   |
| (Z3)-Hexenal                                        |                            | 98%    | 6789-80-6   |
| (Z3)-Hexen-1-ol                                     |                            | 98%    | 928-96-1    |
| $\beta$ -Pinene                                     |                            | >95%   | 19902-08-0  |
| Hexyl acetate                                       |                            | 99%    | 142-92-7    |
| E2-Hexenal                                          |                            | 98%    | 6728-26-3   |
| $\beta$ -Ionone                                     |                            | 96%    | 14901-07-6  |
| $\alpha$ -Ionone                                    |                            | 90%    | 127-41-3    |
| Farnesol                                            |                            | 95%    | 4602-84-0   |
| $\alpha$ -Farnesene                                 |                            | >95%   | 502-61-4    |
| $\alpha$ -Phellandrene                              |                            | >95%   | 99-83-2     |
| Linalool                                            |                            | 95%    | 78-70-6     |
| Ocimene                                             |                            | 90%    | 13877-91-3  |
| Cinnamaldehyde                                      |                            | 98%    | 104-55-2    |
| Camphor                                             |                            | >95%   | 76-22-2     |
| Eucalyptol                                          |                            | >95%   | 470-82-6    |
| Valeraldehyde                                       |                            | >95%   | 110-62-3    |
| Geraniol                                            |                            | 98%    | 106-24-1    |
| Limonene                                            |                            | 99%    | 5989-27-5   |
| $\beta$ -Farnesene                                  |                            | 98%    | 18794-84-8  |
| Camphene                                            |                            | >95%   | 79-92-5     |
