# Supplementary material for: Identification and Functional Characterization of General Odorant Binding Proteins in Orthaga achatina
Source: MDPI journal article supplement (doi:10.3390/insects14030216), 2023-02-22
Supplement: s1 [file s1]

**Table S4.** Prediction of key amino acid residues during the docking of OachGOBPs to different ligands.

| Ligand                 | Different residues within 4.0 Å <sup>a</sup> |                                              | Residues forming H-bond with ligand     |                                          |
|------------------------|----------------------------------------------|----------------------------------------------|-----------------------------------------|------------------------------------------|
|                        | GOBP1                                        | GOBP2                                        | GOBP1                                   | GOBP2                                    |
| <b>Plant volatiles</b> |                                              |                                              |                                         |                                          |
| Z3-Hexenyl acetate     | -                                            | M27, V30, T31, L83, Y98, R132                | -                                       | T31(O···H-O=2.8Å)                        |
| Z3-Hexen-1-ol          | -                                            | M27, V30, T31, T88, I90, L83, R89, R132      | -                                       | T88(O-H···O=2.6Å)<br>R132(O···H-NH=2.2Å) |
| β-Ionone               | -                                            | M27, V30, T31, T88, I90, L83, Y98, R89, R132 | -                                       | S78(O-H···O=2.9Å)                        |
| Farnesol               | S89, R90                                     | M27, V30, T31, T88, I90, L83, Y98, R89, R132 | T32(O-H···O=2.1Å)<br>W60(O···H-NH=2.3Å) | N                                        |
| α-Farnesene            | -                                            | M27, V30, T31, I90, L83, Y98, R132           | -                                       | N                                        |
| α-Phellandrene         | -                                            | M27, V30, T31, T88, I90, L83, Y98, R132      | -                                       | N                                        |
| Linalool               | -                                            | M27, V30, T31, I90, L83, Y98, R132           | -                                       | T31(O-H···O=2.0Å)<br>W59(O···H-NH=2.3Å)  |
| Camphor                | -                                            | I90                                          | -                                       | N                                        |
| <b>Sex pheromone</b>   |                                              |                                              |                                         |                                          |
| Z11-16: OH             | Common                                       | M27, V30, T31, T88, I90, L83, Y98, R89, R132 | W60(O···H-NH=2.5Å)                      | N                                        |
| Z11-16: OAc            | -                                            | M27, V30, T31, T88, I90, L83, Y98, R89, R132 | -                                       | S78(O···H-NH=3.0Å,<br>O···H-O=2.8Å)      |

Note: “N” means no hydrogen bond formation of OachGOBPs and ligands.

(X···Y=ZÅ), X represents the atoms on the ligand, ··· means the hydrogen bond, Y represents the atom on the amino acid residue, and Z represents the distance of hydrogen bond between OachGOBPs and ligands. A shorter distance indicates a stronger interaction between OachGOBPs and ligands.

<sup>a</sup> Common amino acid residues in the binding pockets of OachGOBP1 or 2 with 4.0 Å are shown as follows: GOBP1: M28, M91, M113, V31, V137, T32, T96, F35, F56, F59, F99, F141, W60, I75, I117, I134, S79, L84, L85, H92, E121, R133 and A138; GOBP2: M95, M112, V133, V136, F34, F55, F58, F140, W59, I74, I116, S78, L84, E120 and A137.
