# Supplementary material for: Identification and Functional Characterization of General Odorant Binding Proteins in Orthaga achatina
Source: MDPI journal article supplement (doi:10.3390/insects14030216), 2023-02-22
Supplement: s1 [file s1]

**Table S1.** Primers used in this study.

| Primer name                               | Sequence (5'-3')                                       |                                                          |
|-------------------------------------------|--------------------------------------------------------|----------------------------------------------------------|
|                                           | Forward primer                                         | Reverse primer                                           |
| <b>Primers for RT-PCR</b>                 |                                                        |                                                          |
| GOBP1-F/R                                 | GCAGACGTTGTGGTTATGAAA                                  | CTAAGCTTCTGCTTCCATAATGA                                  |
| GOBP2-F/R                                 | GATGCTGAAGTGATGAGCCA                                   | CTAATATTTCTCCATGACGGCT                                   |
| $\beta$ -Actin-F/R                        | GAGAGGGAAATCGTTCGTGACATC                               | GGAAGCGGCAGCGGTAGC                                       |
| <b>Primers for qPCR</b>                   |                                                        |                                                          |
| GOBP1-F/R                                 | CGTTGTGGTTATGAAAGATG                                   | CGGTGAGAAGGTTGAAG                                        |
| GOBP2-F/R                                 | TCTCGTTGGTGCTACT                                       | CTTGCGGACACTCTTC                                         |
| $\beta$ -Actin-F/R                        | CTCTGGTGATGGTGTCTC                                     | GAGGTAGTCGGTCAAGTC                                       |
| GAPDH-F/R                                 | GCTGAGTATGTTGTAGAATCC                                  | GGAGCAGAGATGATAACCT                                      |
| <b>Primers for Prokaryotic expression</b> |                                                        |                                                          |
| GOBP1-F/R                                 | GCCATGGCTGATATC <u>GGATCC</u> GCAGACGTT<br>GTGGTTATGAA | GTGGTGGTGGTGGTG <u>CTCGAG</u> CTAAGCTTC<br>TGCTTCCATAATG |
| GOBP2-F/R                                 | GCCATGGCTGATATC <u>GGATCC</u> GATGCTGAA<br>GTGATGAGCCA | GTGGTGGTGGTGGTG <u>CTCGAG</u> CTAATATTC<br>TCCATGAC      |
