# Supplementary figures and images for: Identification and Functional Characterization of General Odorant Binding Proteins in Orthaga achatina
Source: MDPI journal article supplement (doi:10.3390/insects14030216), 2023-02-22

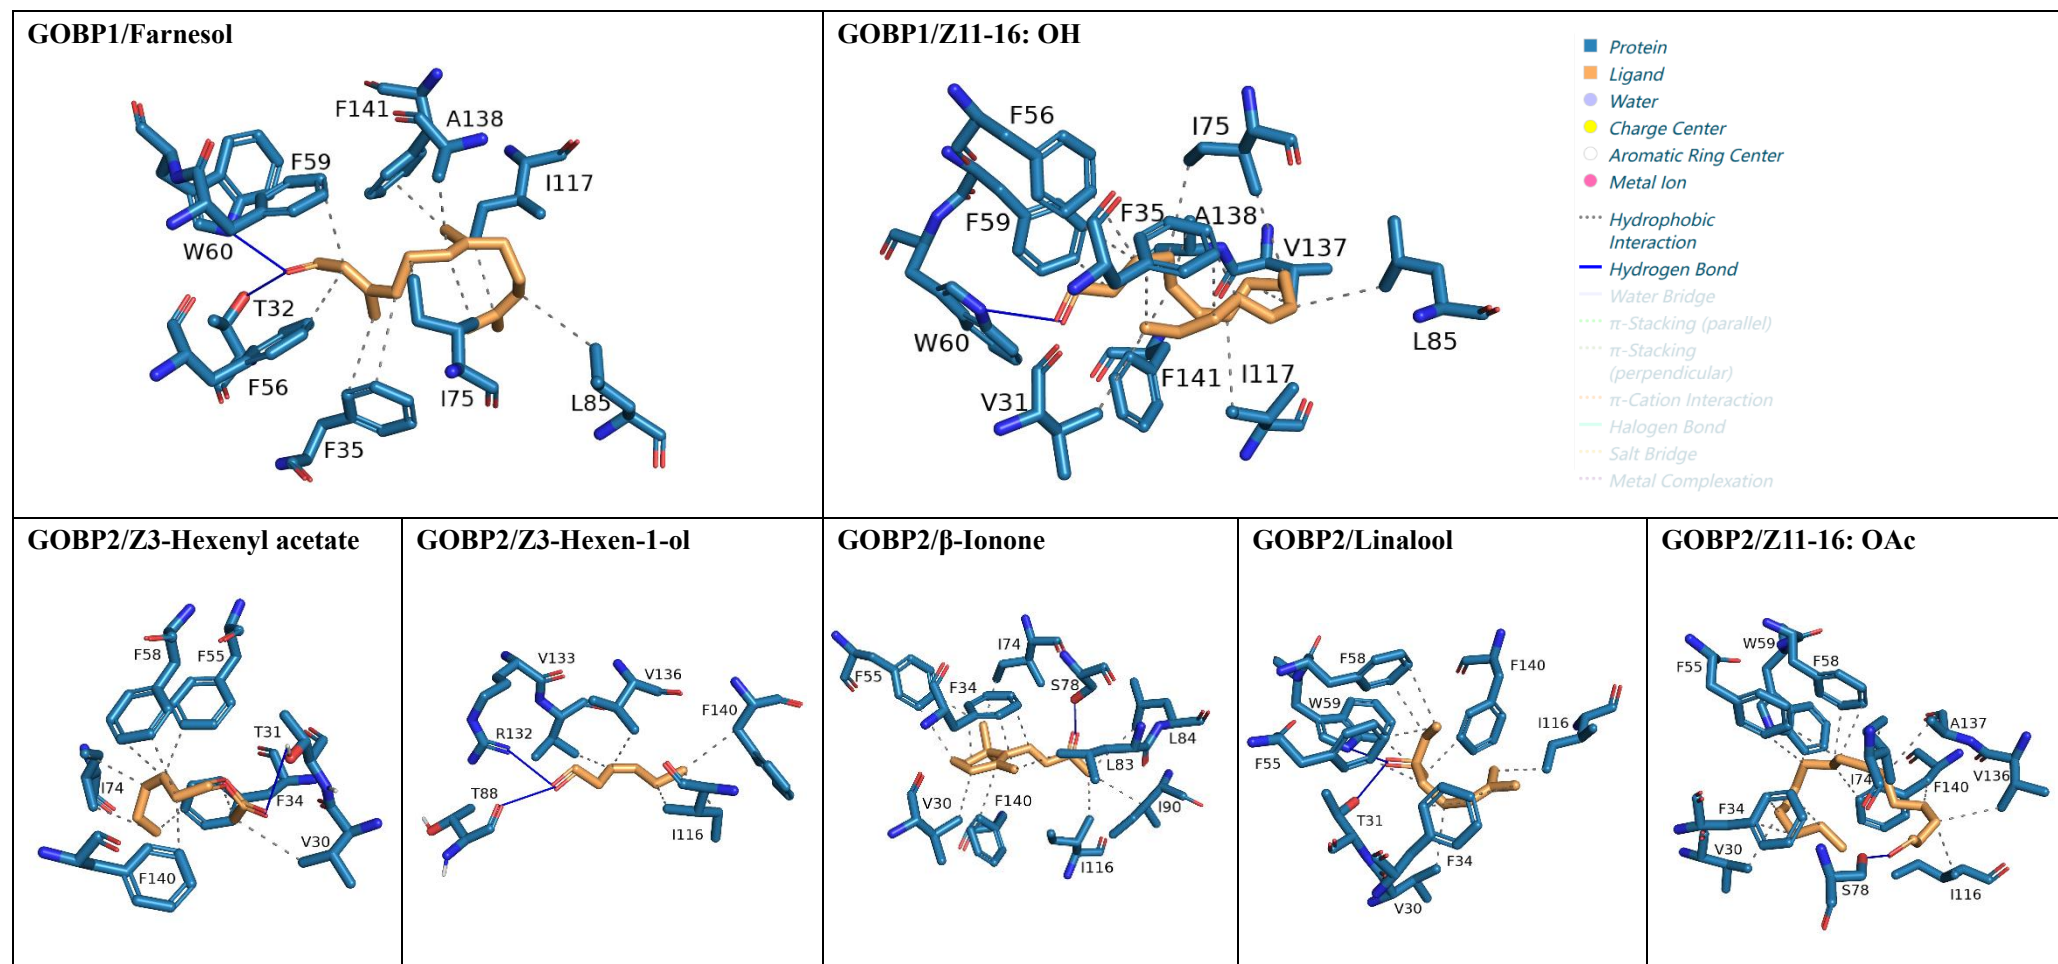

**Figure S3.** 2D-plots of contacts showing the GOBPs-ligands interactions.

Supplement: s1 [file s1]
